# Supplementary material
Source: HighWire-hosted journal article supplement (https://bmjopen.bmj.com/content/12/1/e054069)

**Supplementary Figure 1.** Sensitivity analysis after restricting to those enrolled prior to December 3<sup>rd</sup>, 2020

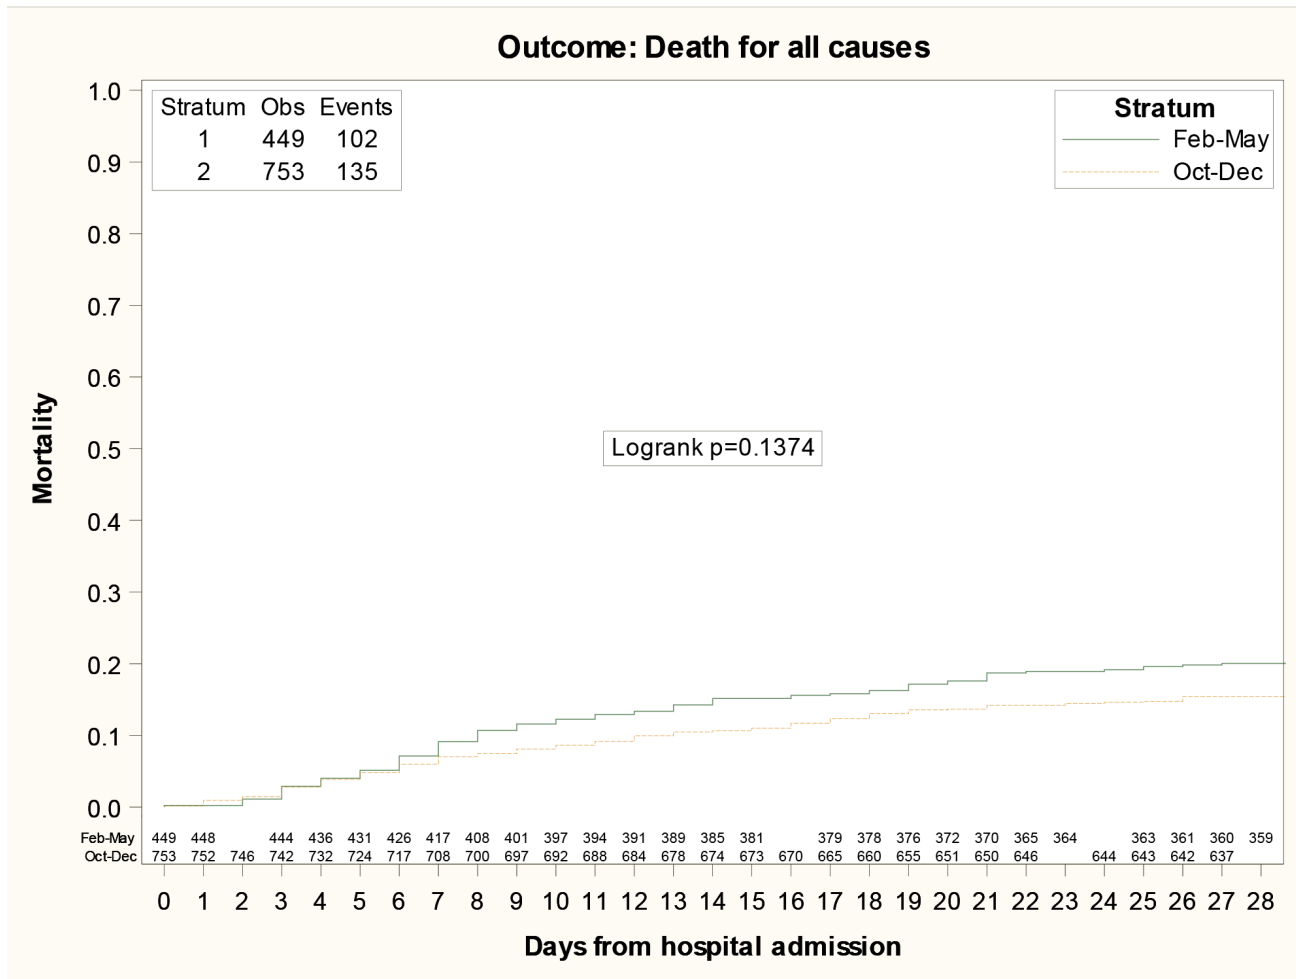

**Supplementary Figure 2.** Sensitivity analysis after restricting to those aged 18-75 and without solid cancers

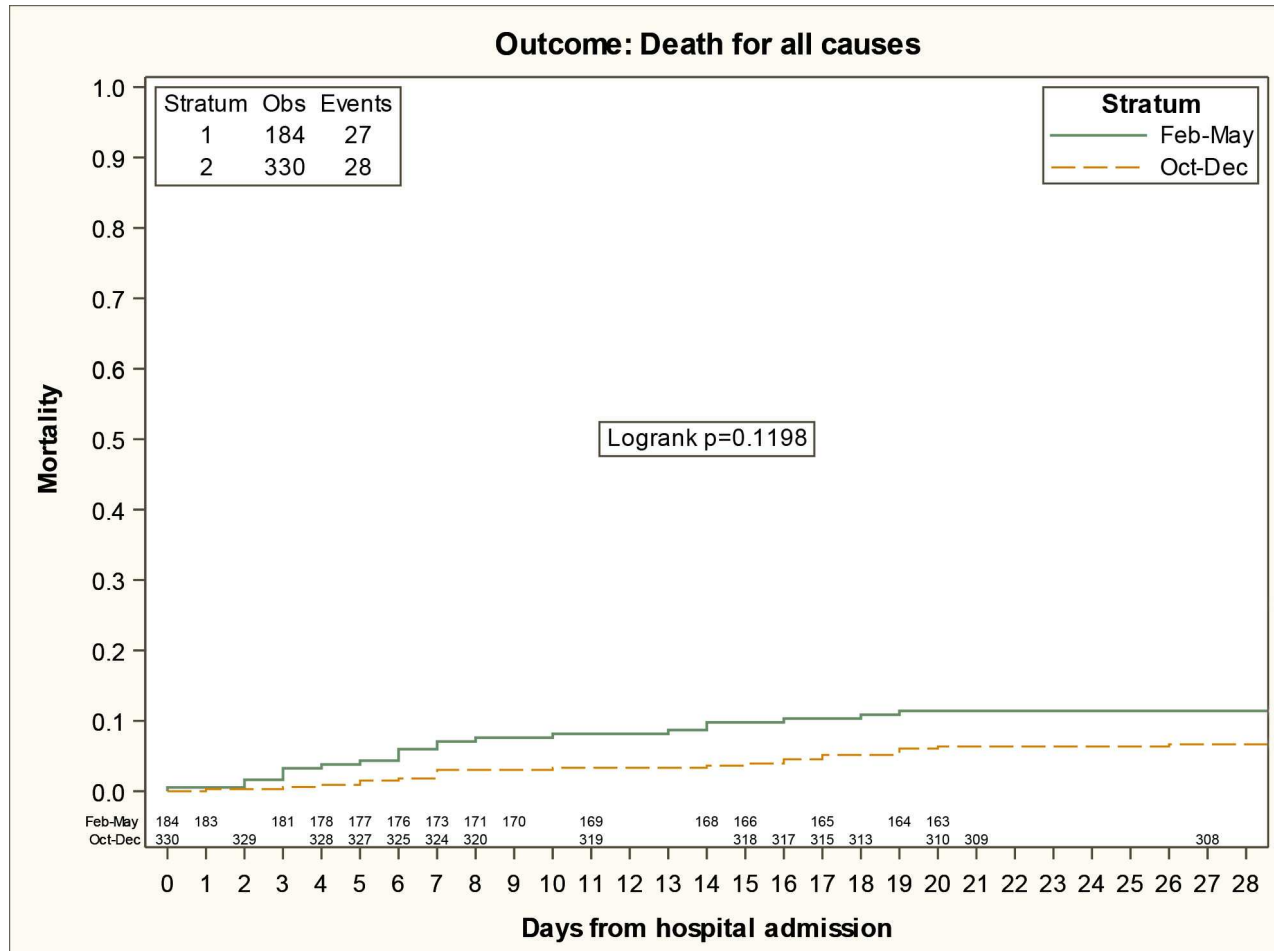

**Supplementary Figure 3.** Survival KM estimates stratified by pandemic wave, restricted to patients who required the use of respiratory support (HFNO, NIV and IMV)

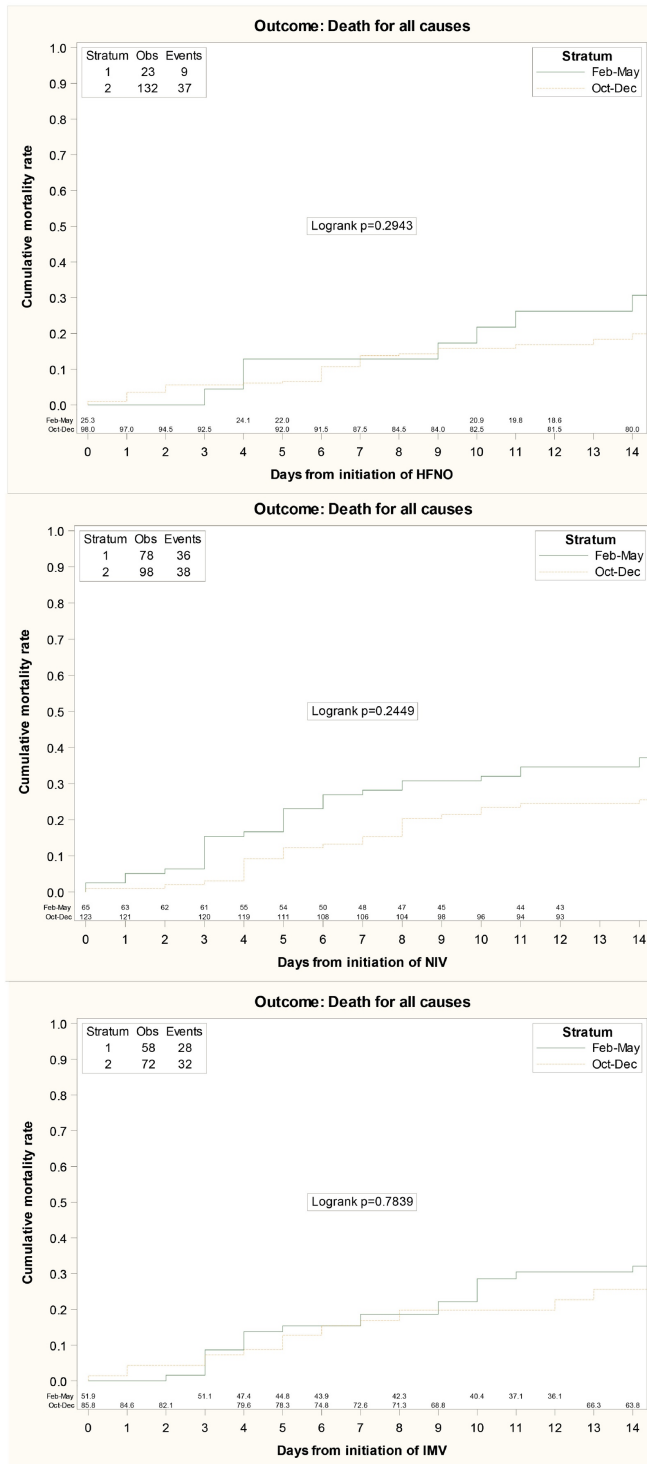

Supplement: inline-supplementary-material-1 [file inline-supplementary-material-1.pdf]
